# Supplementary material for: Valuable Features in Mobile Health Apps for Patients and Consumers: Content Analysis of Apps and User Ratings
Source: PubMed Central journal article supplement (PMC4446515; doi:10.2196/mhealth.4283), 2015-05-13
Supplement: mhealth_v3i2e40_app1.pdf [file mhealth_v3i2e40_app1.pdf]

Multimedia Appendix 1: Side-by-Side Comparison of Multiple Regression Models to Explain Users' App Ratings

|                 | Final Model / n=234 apps |       |                    | Model / n=247 apps     |       |                    |
|-----------------|--------------------------|-------|--------------------|------------------------|-------|--------------------|
| Source:         | B                        | SE B  | $\beta$            | B                      | SE B  | $\beta$            |
| Microsoft Excel | 0.172                    | 0.111 | .103               | 0.155                  | 0.108 | .091               |
| Cost            | 0.279 <sup>a</sup>       | 0.130 | .154 <sup>a</sup>  | 0.307 <sup>a</sup>     | 0.126 | .162 <sup>a</sup>  |
| Usability       | 0.357 <sup>a</sup>       | 0.127 | .184 <sup>b</sup>  | 0.360 <sup>b</sup>     | 0.121 | .189 <sup>b</sup>  |
| Plan or Orders  | -0.373 <sup>b</sup>      | 0.125 | -.226 <sup>b</sup> | -0.335 <sup>b</sup>    | 0.120 | -.205 <sup>b</sup> |
| Tracker         | 0.226 <sup>a</sup>       | 0.109 | .151 <sup>a</sup>  | 0.329                  | 0.184 | .127               |
| Export of Data  |                          |       |                    |                        |       |                    |
|                 | R <sup>2</sup> = 0.093   |       |                    | R <sup>2</sup> = 0.090 |       |                    |
|                 | F= 4.667                 |       |                    | F= 4.769               |       |                    |

Notes: 95% Confidence Level.

<sup>a</sup>P < .05. <sup>b</sup>P < .01.
